# Supplementary material
Source: PubMed Central journal article supplement (PMC2664624)

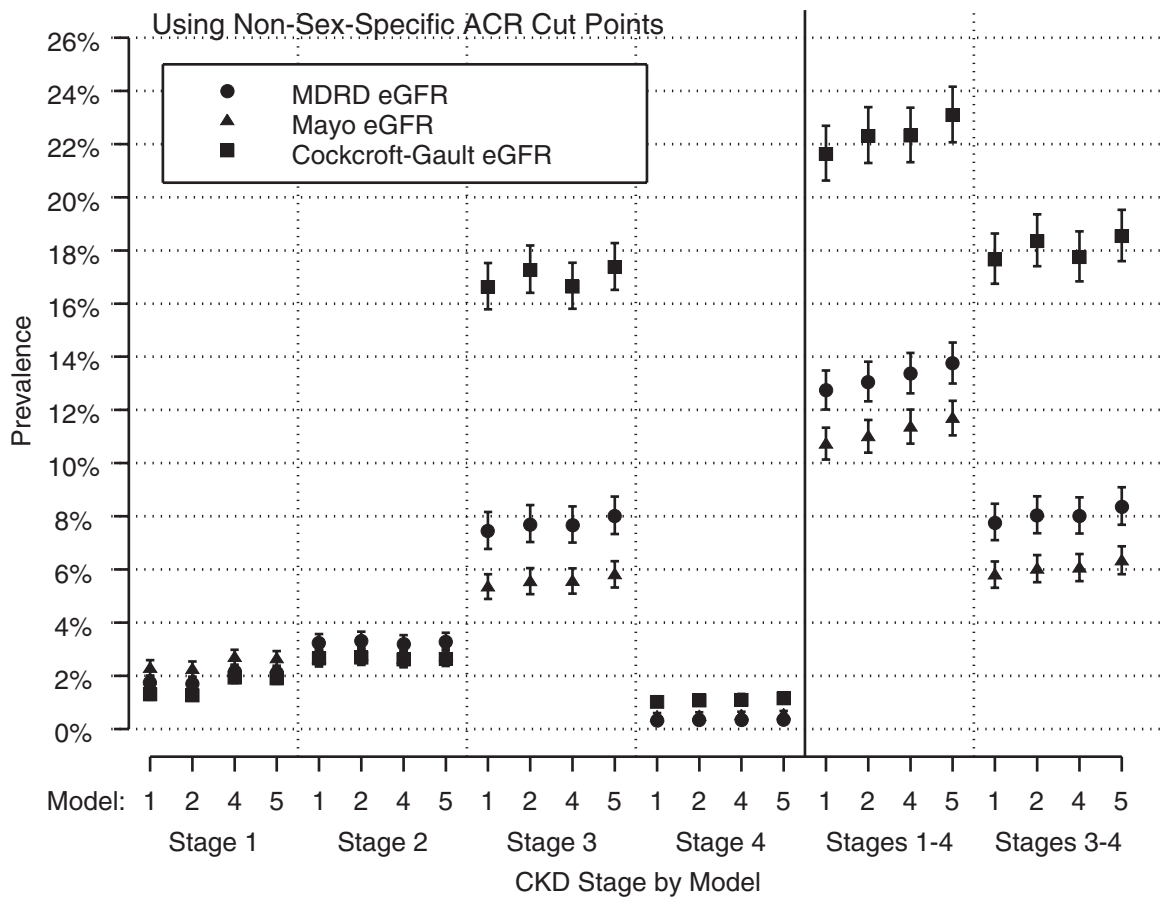

Supplement: NIHMS92184-supplement-01.pdf [file NIHMS92184-supplement-01.pdf]

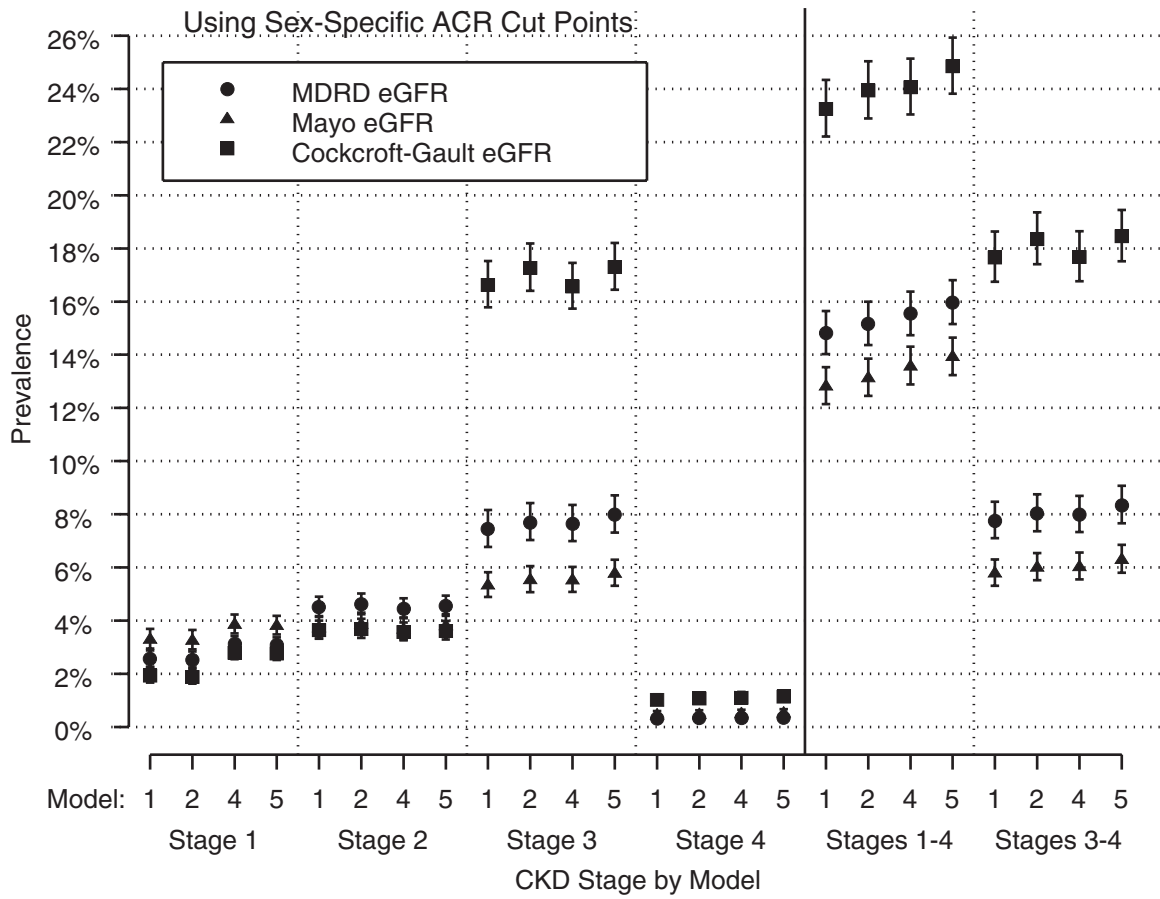

Supplement: NIHMS92184-supplement-02.pdf [file NIHMS92184-supplement-02.pdf]
